# Supplementary material
Source: MDPI journal article supplement (https://www.mdpi.com/2071-1050/12/14/5859)

Supplementary Materials A – Flat Hillslope Design of the Squares and Stormwater Network

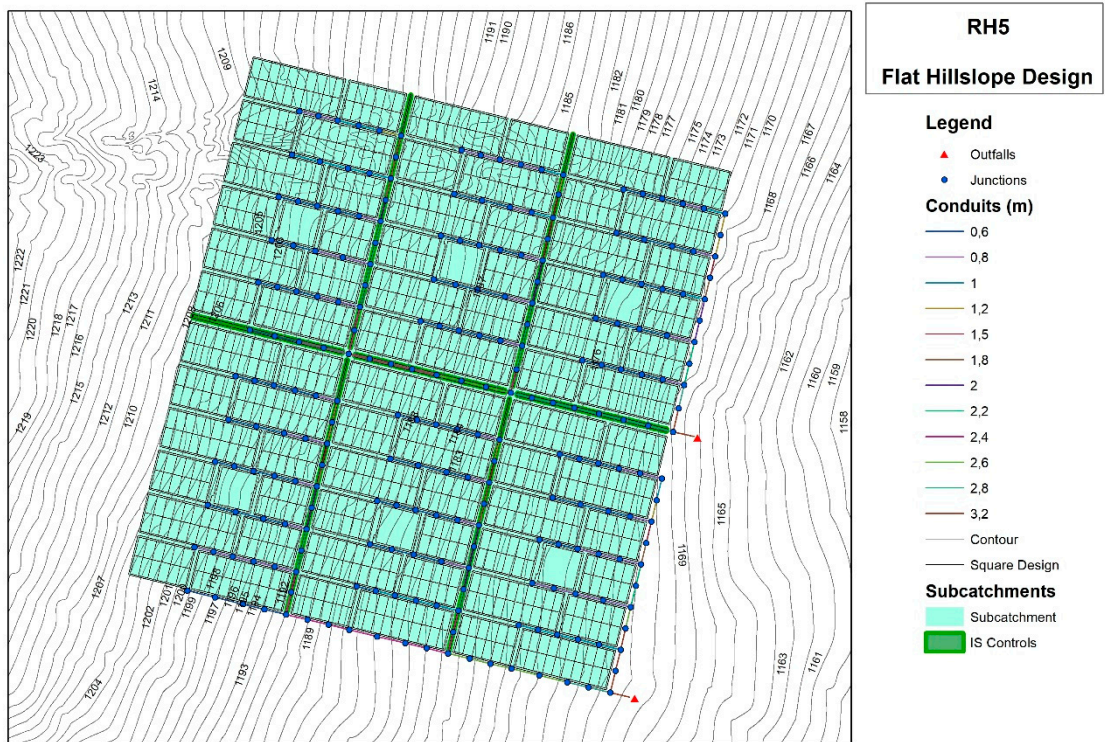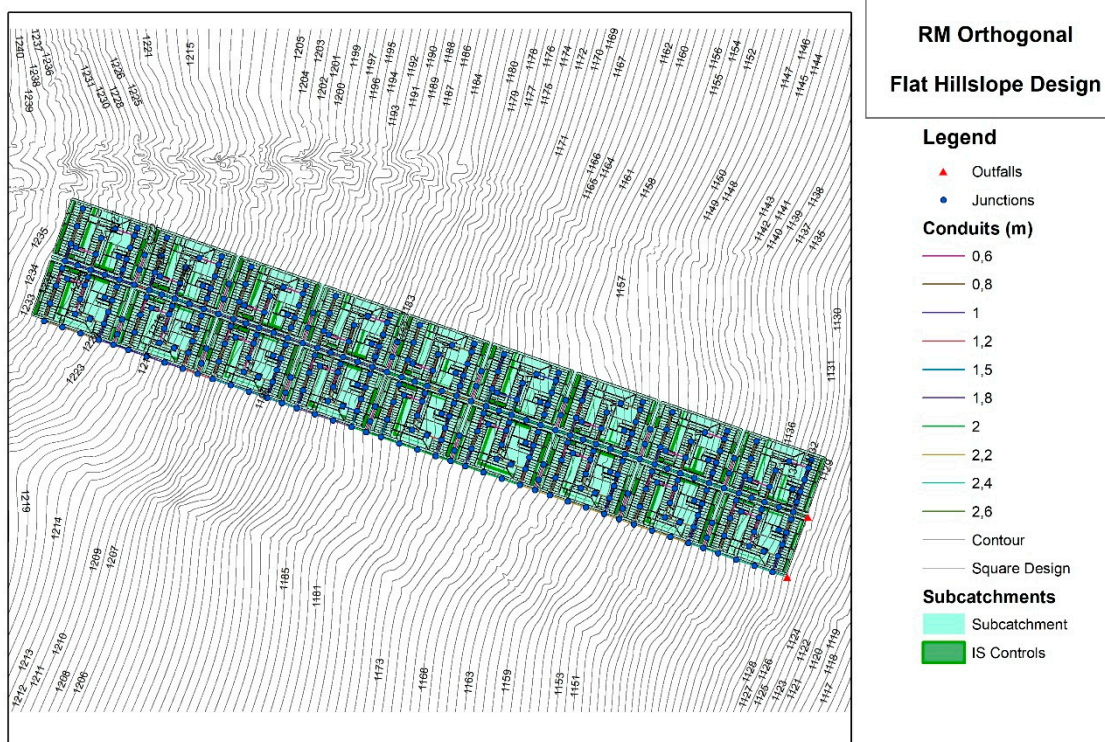



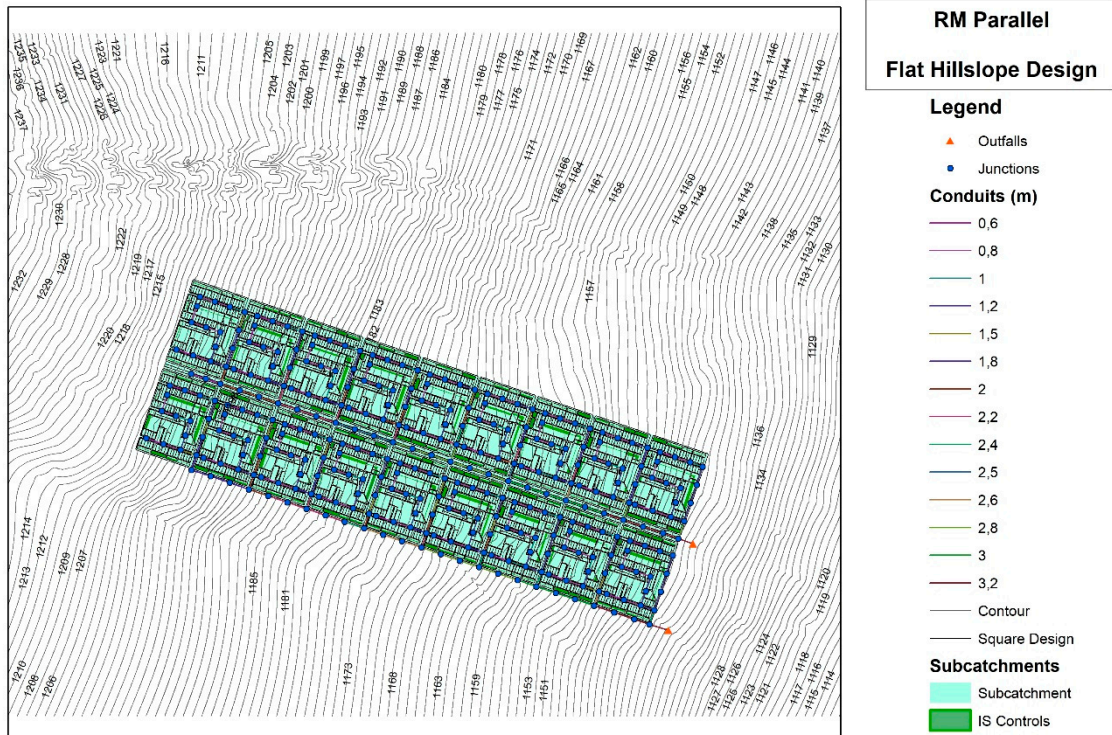

## Supplementary Materials B – Convex Convergent Hillslope Design of the Squares and Stormwater Network

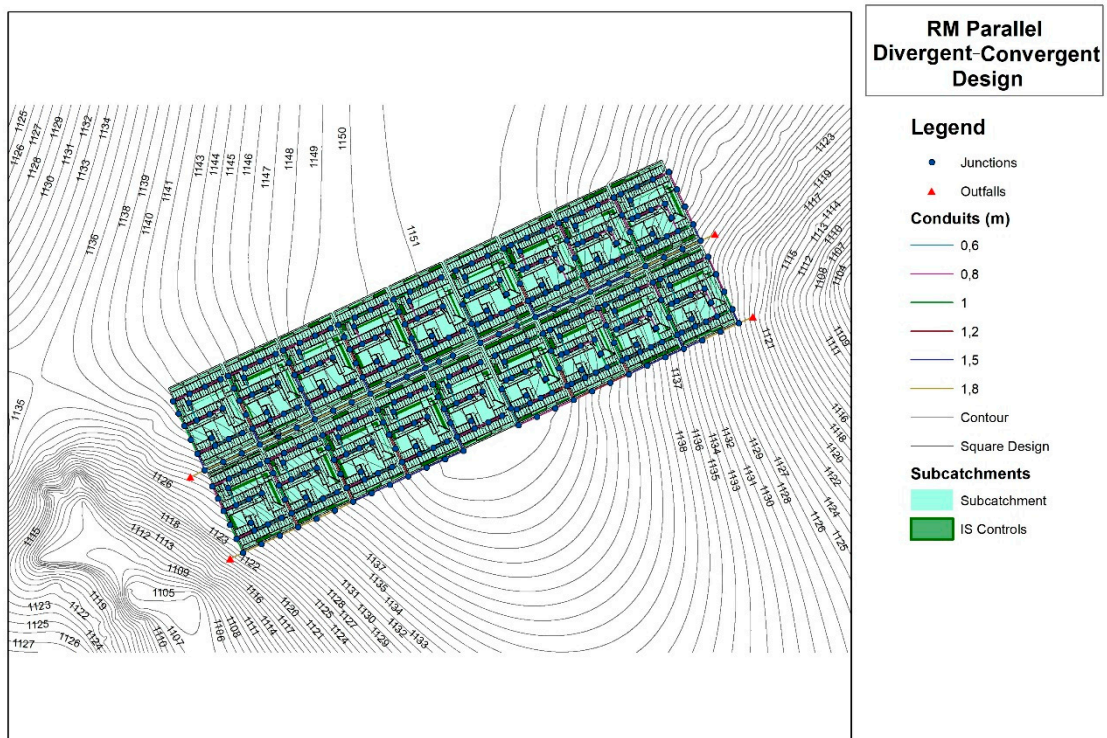

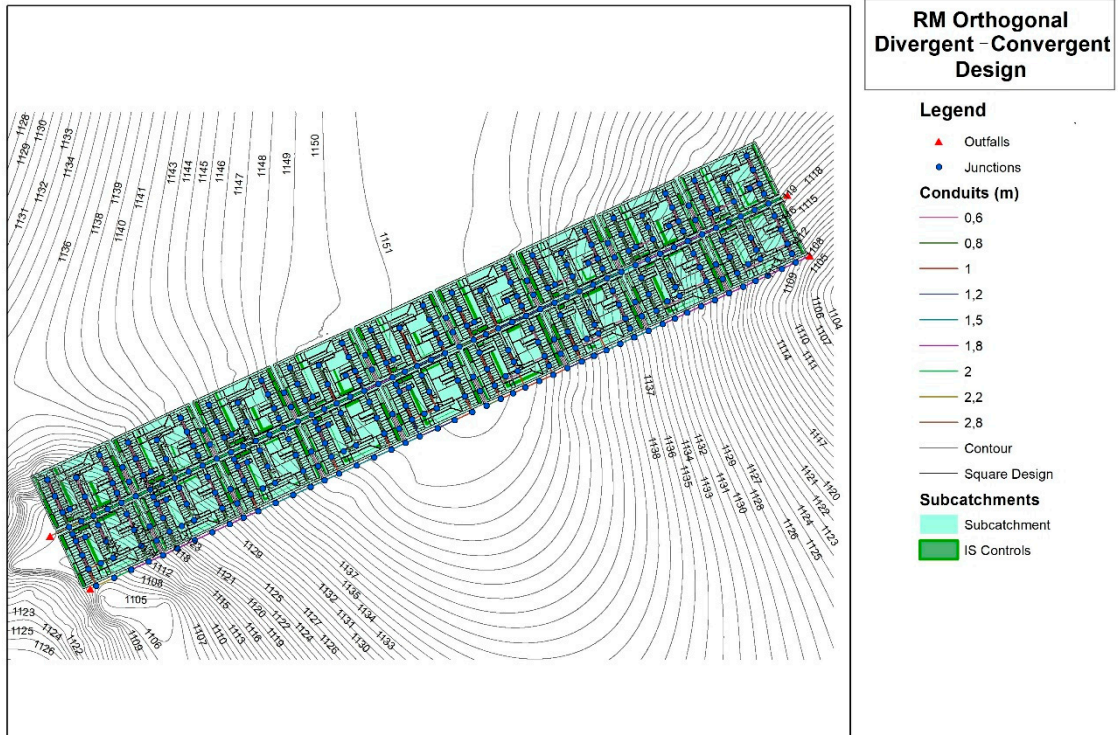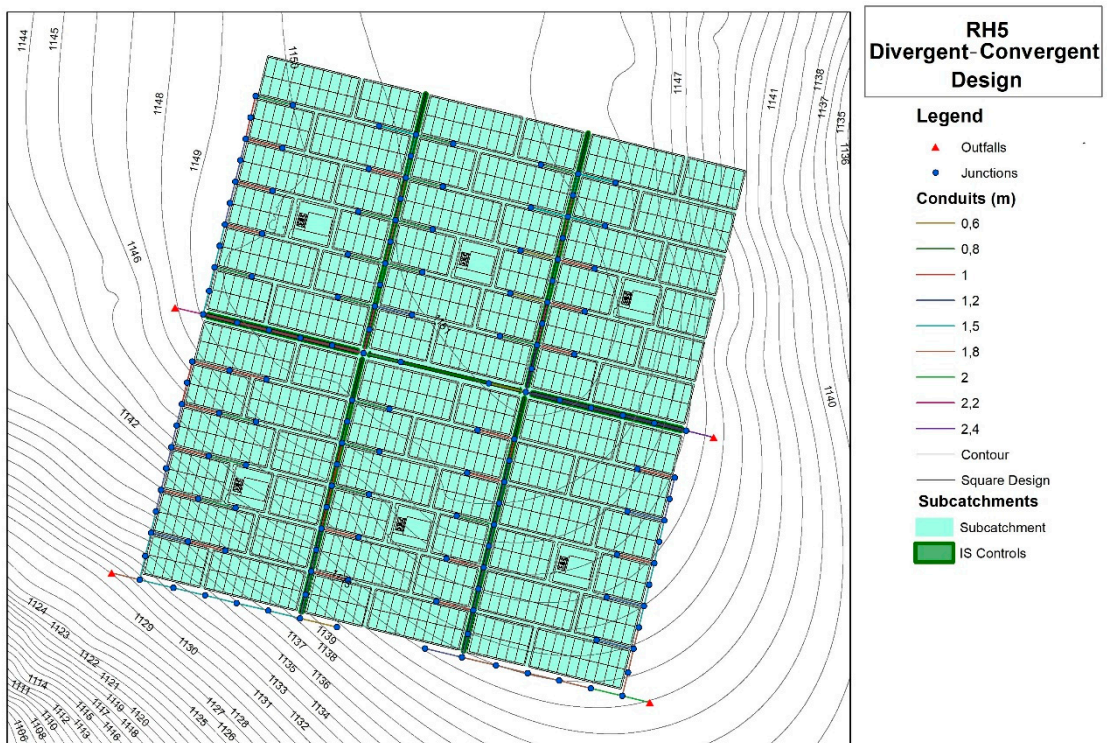



Supplementary Materials C – Convergent Hillslope Design of the Squares and Stormwater Network

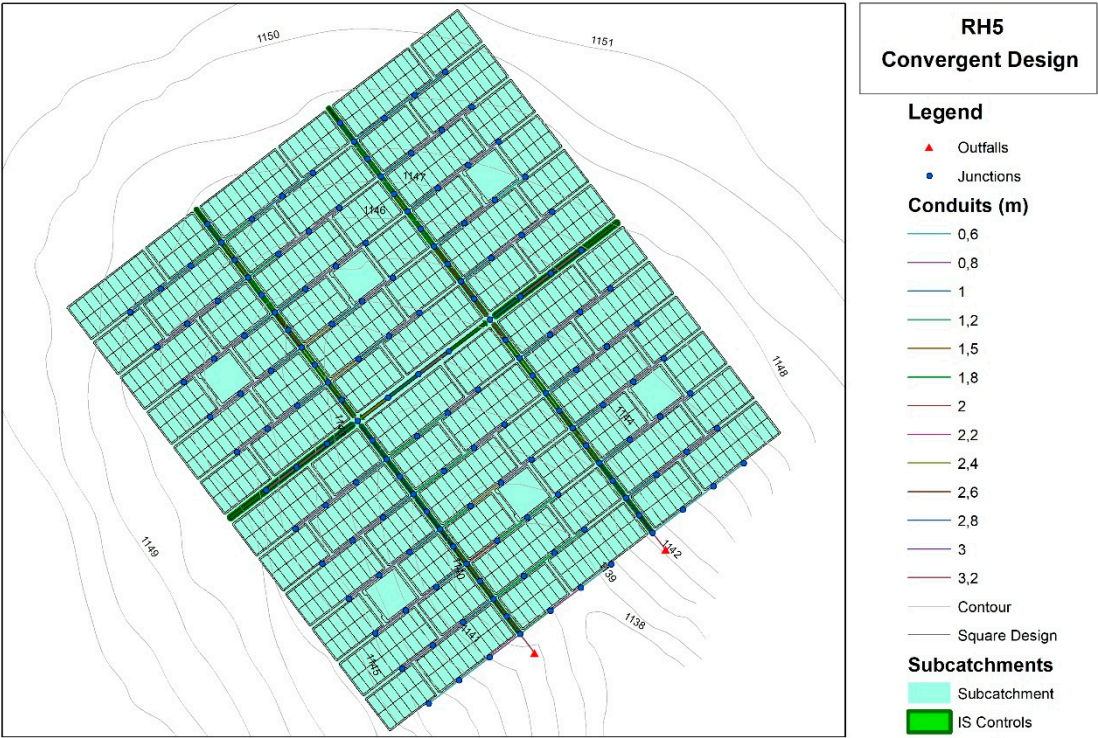

Supplementary Materials D – Divergent Hillslope Design of the Squares and Stormwater Network

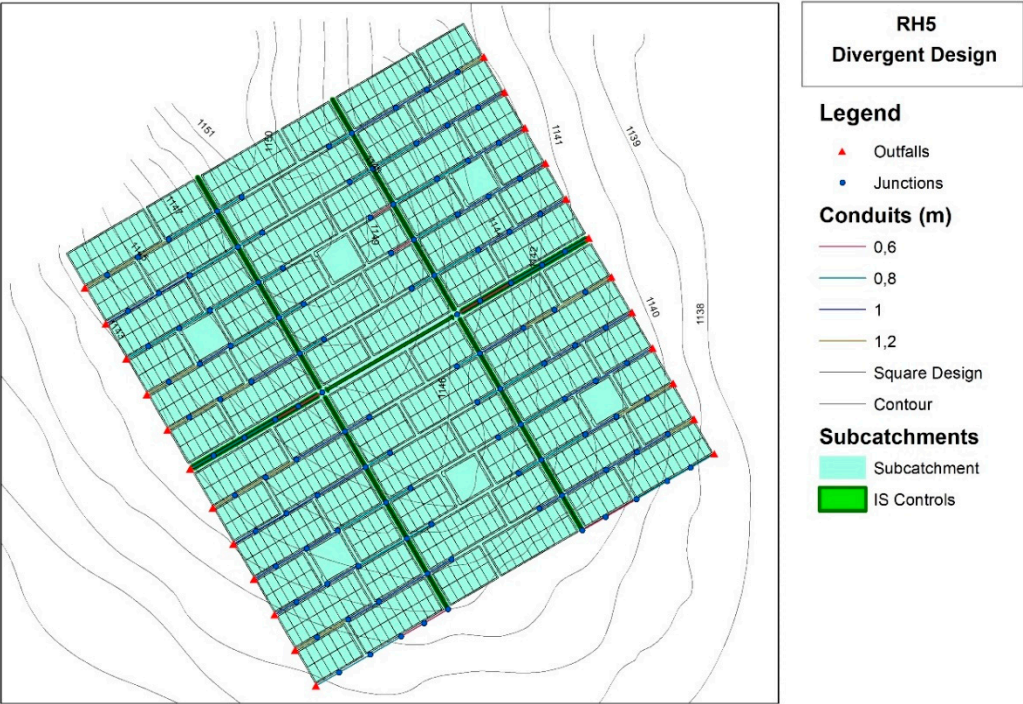

Supplement: s1 [file s1]
